# Supplementary material for: Capgermacrenes A and B, Bioactive Secondary Metabolites from a Bornean Soft Coral, Capnella sp
Source: PubMed Central journal article supplement (PMC4446621; doi:10.3390/md13053103), 2015-05-19
Supplement: marinedrugs-13-03103-s001.pdf [file marinedrugs-13-03103-s001.pdf]

## Supplementary Information

**Figure S1.**  $^1\text{H}$ -NMR spectrum of capgermacrene A (**1**) in  $\text{CDCl}_3$  (600 MHz).

**Figure S2.**  $^{13}\text{C}$ -NMR spectrum of capgermacrene A (**1**) in  $\text{CDCl}_3$  (150 MHz).

**Figure S3.** DEPT-135 spectrum of capgermacrene A (**1**) in  $\text{CDCl}_3$ .

**Figure S4.** HSQC spectrum of capgermacrene A (**1**) in  $\text{CDCl}_3$ .

**Figure S5.**  $^1\text{H}$ - $^1\text{H}$  COSY spectrum of capgermacrene A (**1**) in  $\text{CDCl}_3$ .

**Figure S6.** HMBC spectrum of capgermacrene A (**1**) in  $\text{CDCl}_3$ .

**Figure S7.** NOESY spectrum of capgermacrene A (**1**) in  $\text{CDCl}_3$ .

**Figure S8.** HR-TOFMS data of capgermacrene A (**1**).

**Figure S9.**  $^1\text{H}$ -NMR spectrum of capgermacrene B (**2**) in  $\text{CDCl}_3$  (600 MHz).

**Figure S10.**  $^{13}\text{C}$ -NMR spectrum of capgermacrene B (**2**) in  $\text{CDCl}_3$  (150 MHz).

**Figure S11.** DEPT-135 spectrum of capgermacrene B (**2**) in  $\text{CDCl}_3$ .

**Figure S12.** HSQC spectrum of capgermacrene B (**2**) in  $\text{CDCl}_3$ .

**Figure S13.**  $^1\text{H}$ - $^1\text{H}$  COSY spectrum of capgermacrene B (**2**) in  $\text{CDCl}_3$ .

**Figure S14.** HMBC spectrum of capgermacrene B (**2**) in  $\text{CDCl}_3$ .

**Figure S15.** NOESY spectrum of capgermacrene B (**2**) in  $\text{CDCl}_3$ .

**Figure S16.** HR-TOFMS data of capgermacrene B (**2**).

QCSV#338#PHAN#SC49-F2-1-H-3.jdf

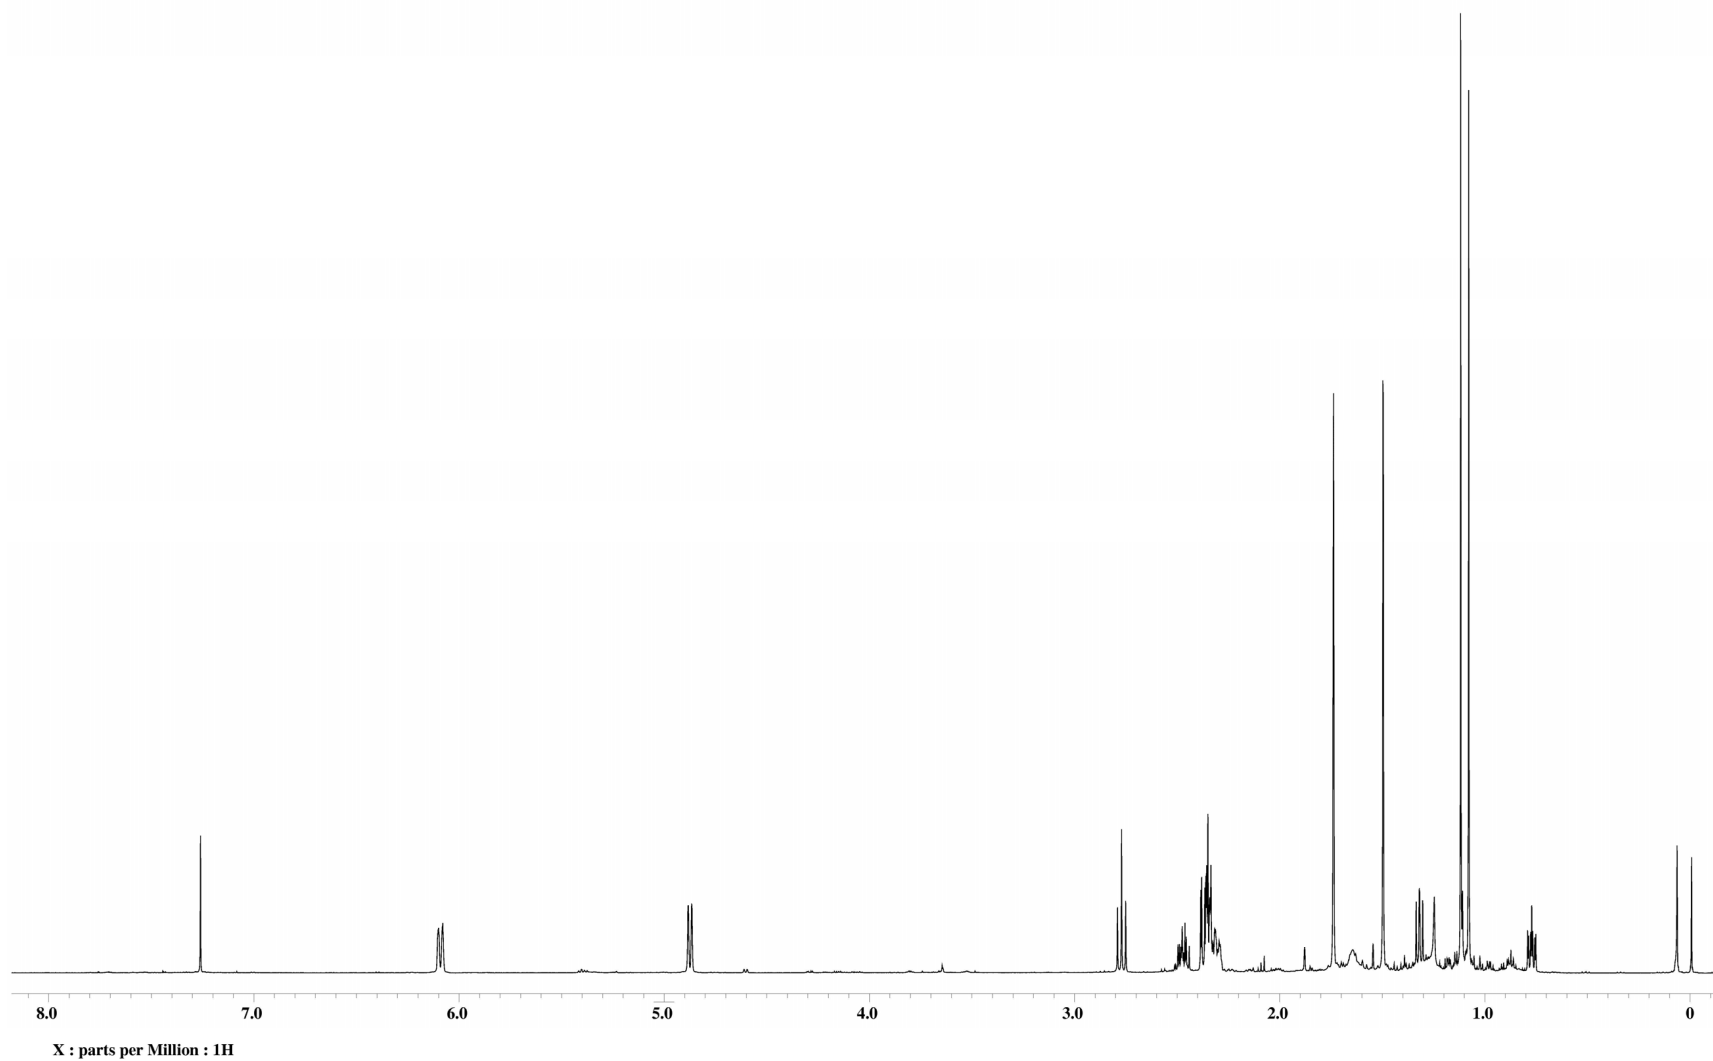

**Figure S1.** <sup>1</sup>H-NMR spectrum of capgermacrene A (**1**) in CDCl<sub>3</sub> (600 MHz).

QCSV#339#PHAN#SC49-F2-1-C-4.jdf

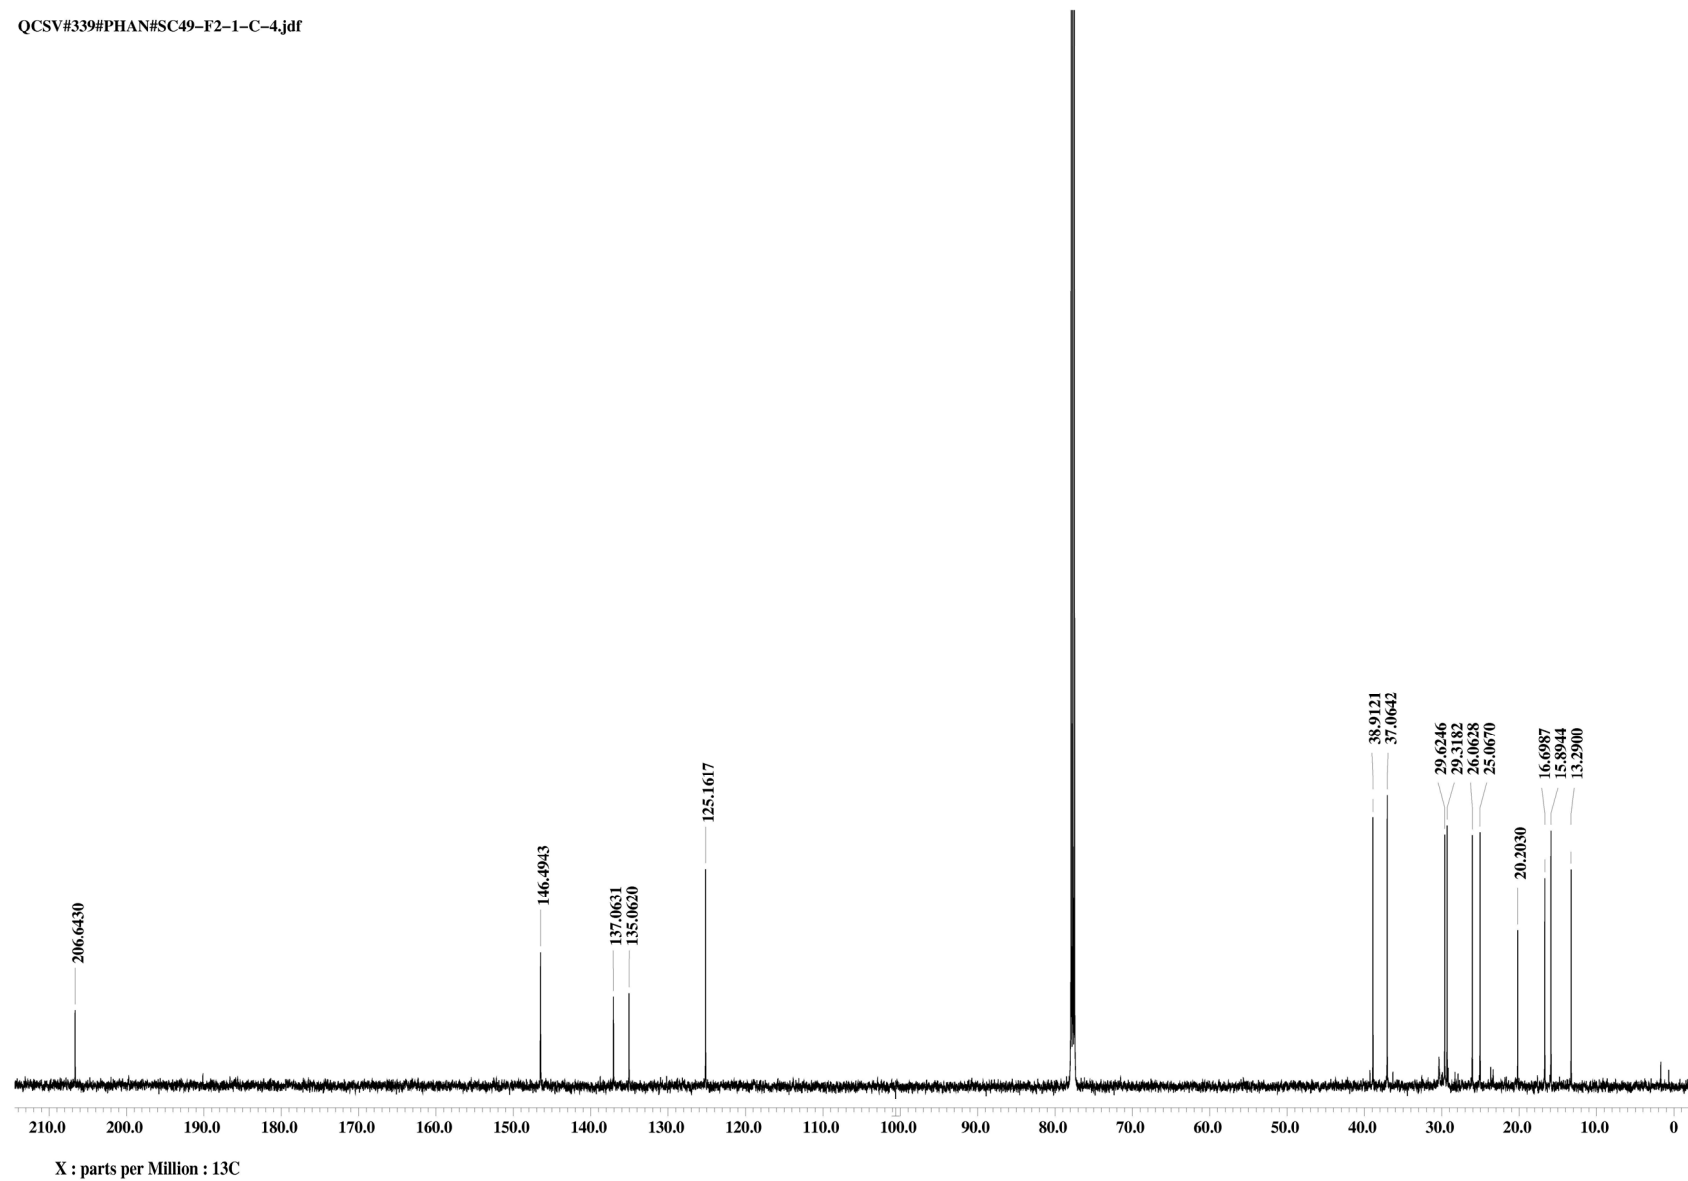

**Figure S2.**  $^{13}\text{C}$ -NMR spectrum of capgermacrene A (1) in  $\text{CDCl}_3$  (150 MHz).

QCSV#340#PHAN#SC49-F2-1-DEPT135-2.jdf

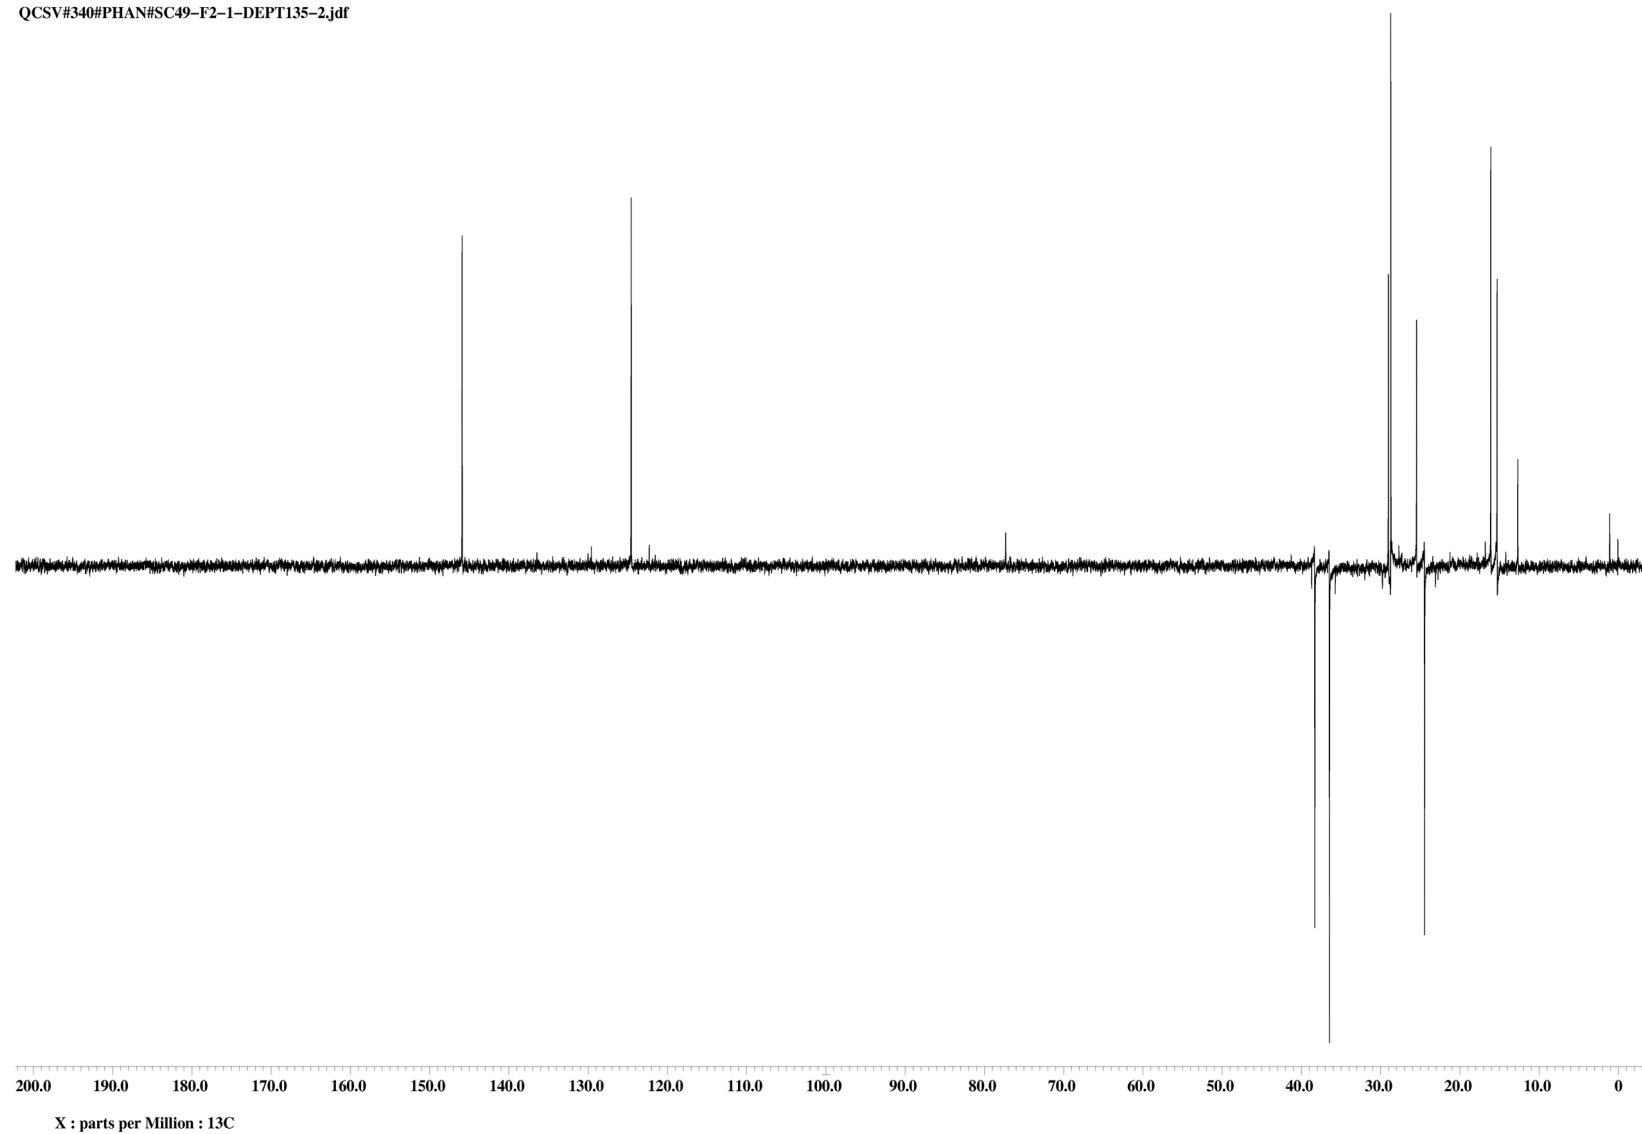

**Figure S3.** DEPT-135 spectrum of capgermacrene A (**1**) in CDCl<sub>3</sub>.

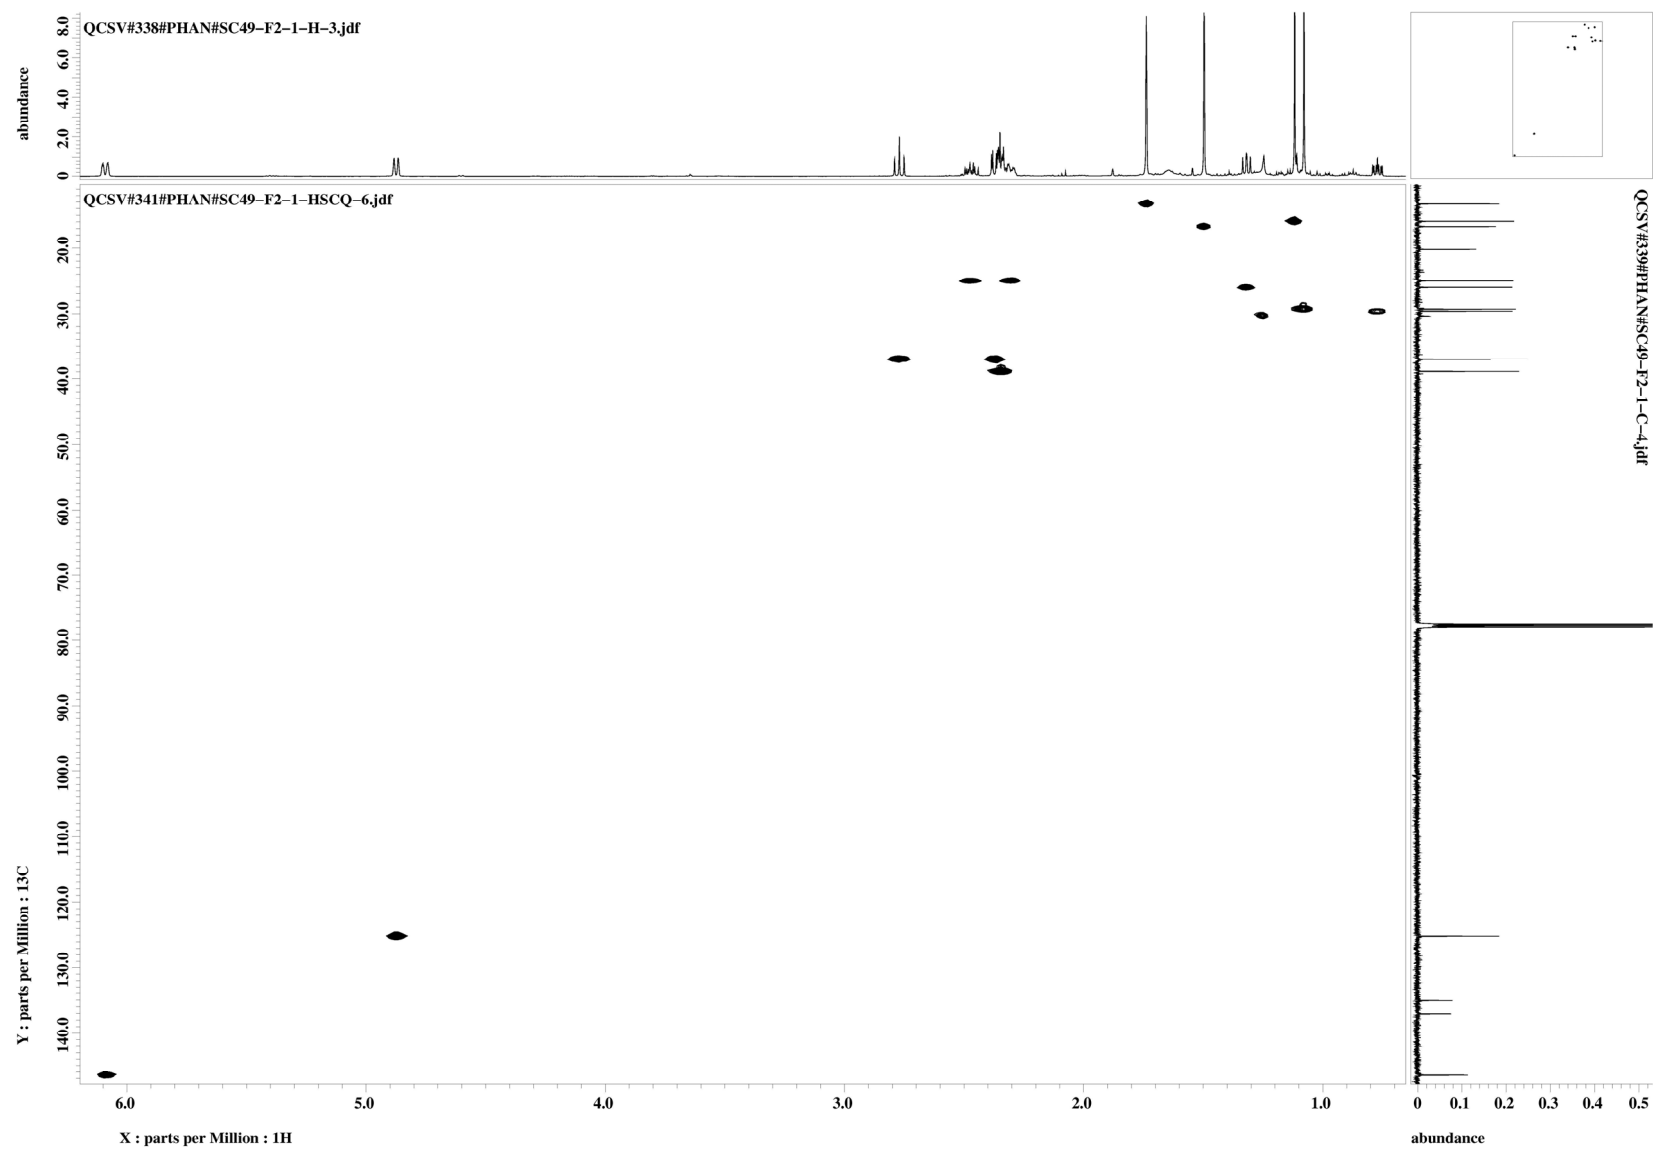

Figure S4. HSQC spectrum of capgermacrene A (1) in  $\text{CDCl}_3$ .

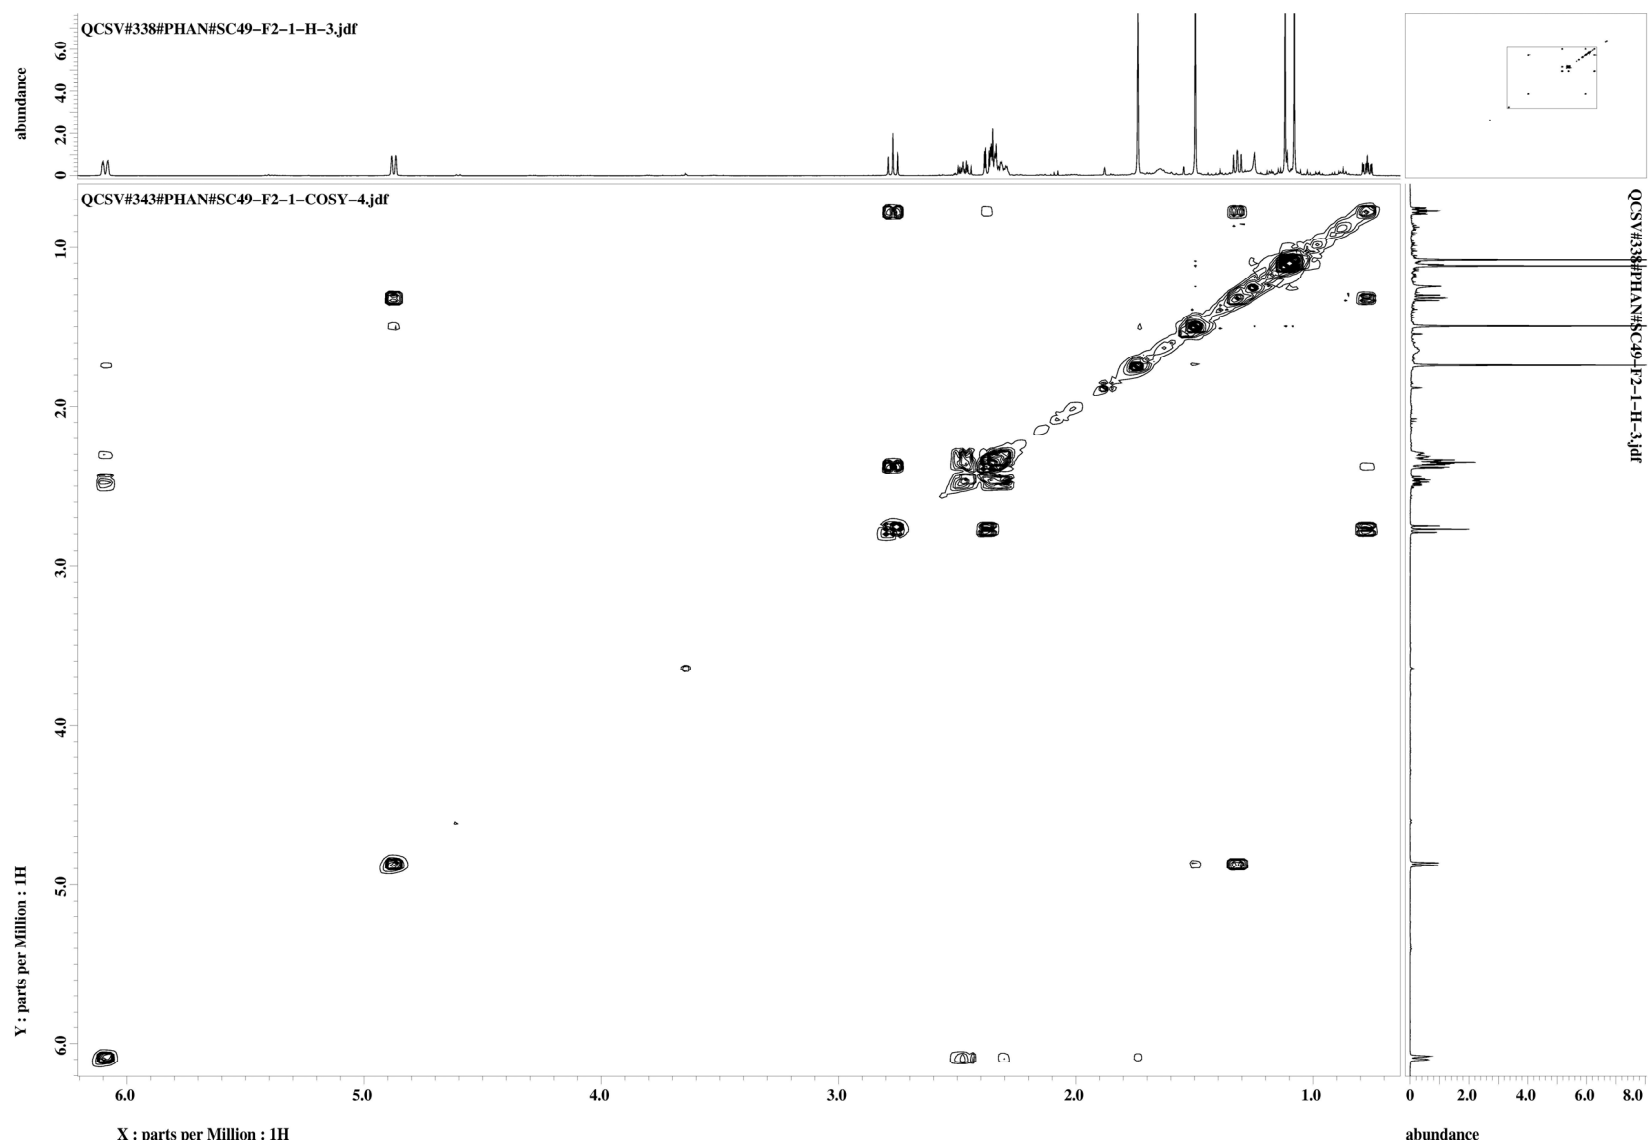

**Figure S5.**  $^1\text{H}$ - $^1\text{H}$  COSY spectrum of capgermacrene A (**1**) in  $\text{CDCl}_3$ .

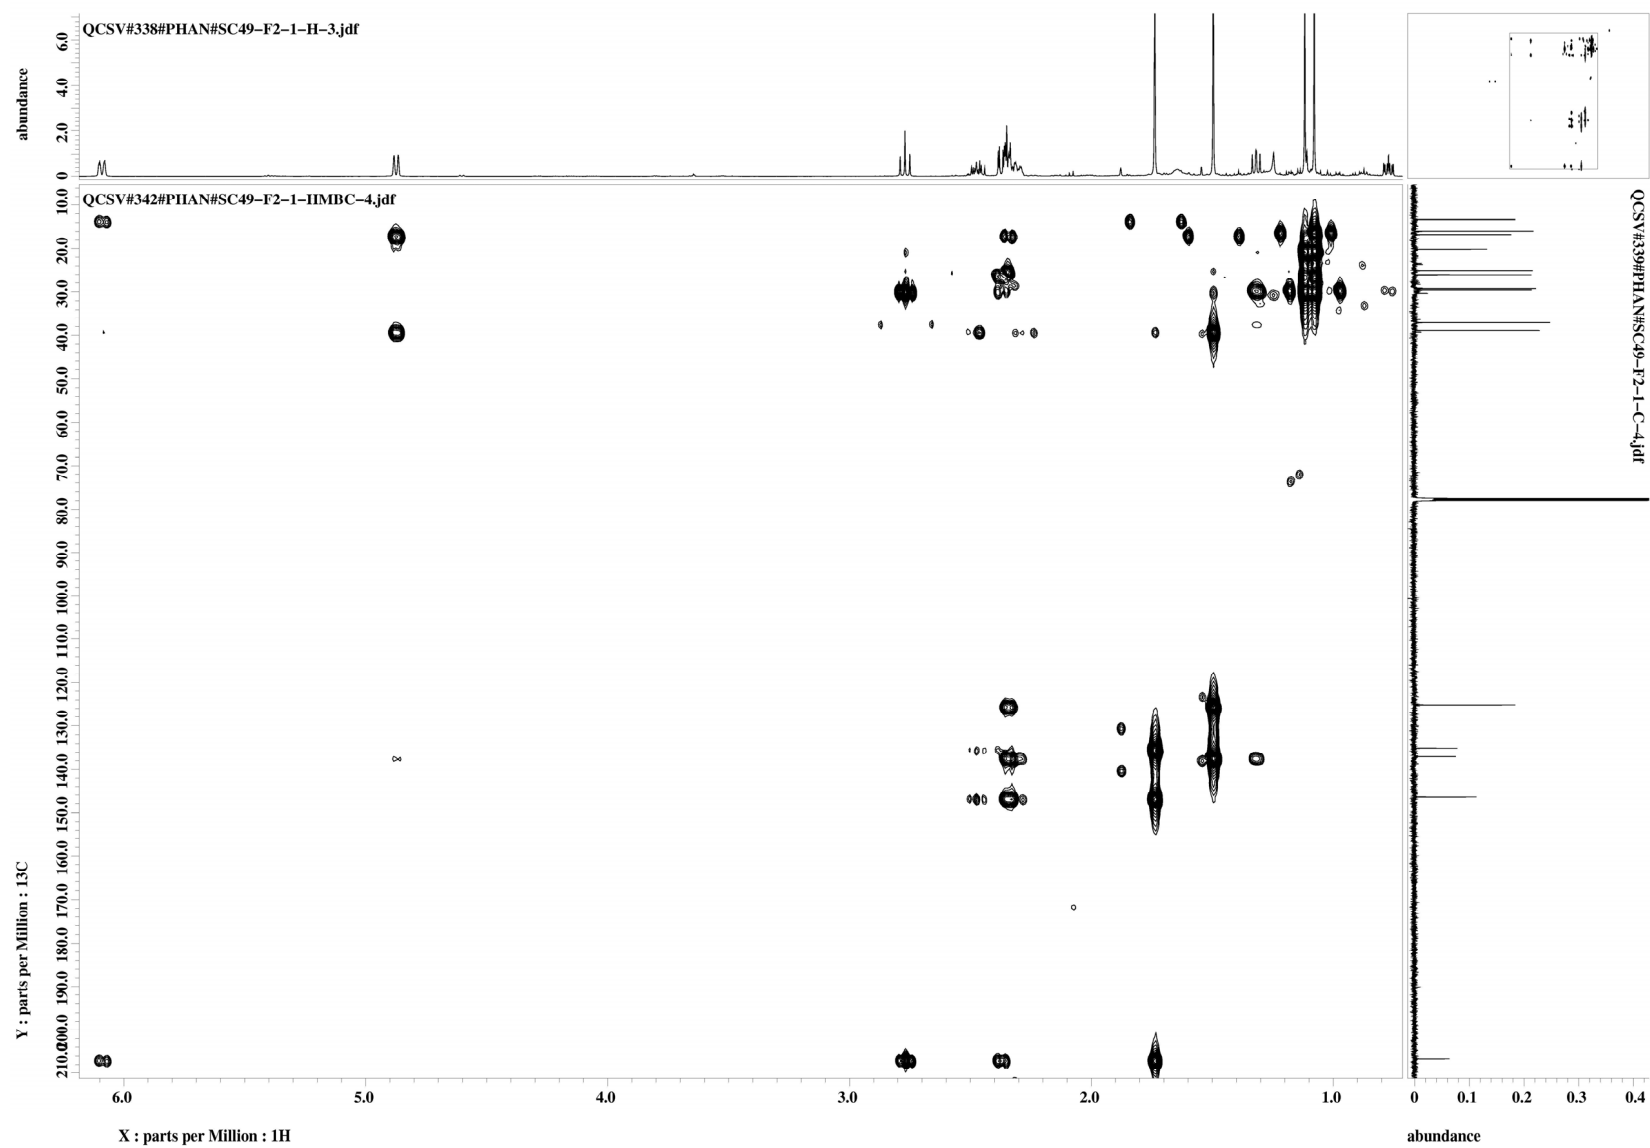

Figure S6. HMBC spectrum of capgermacrene A (1) in CDCl<sub>3</sub>.

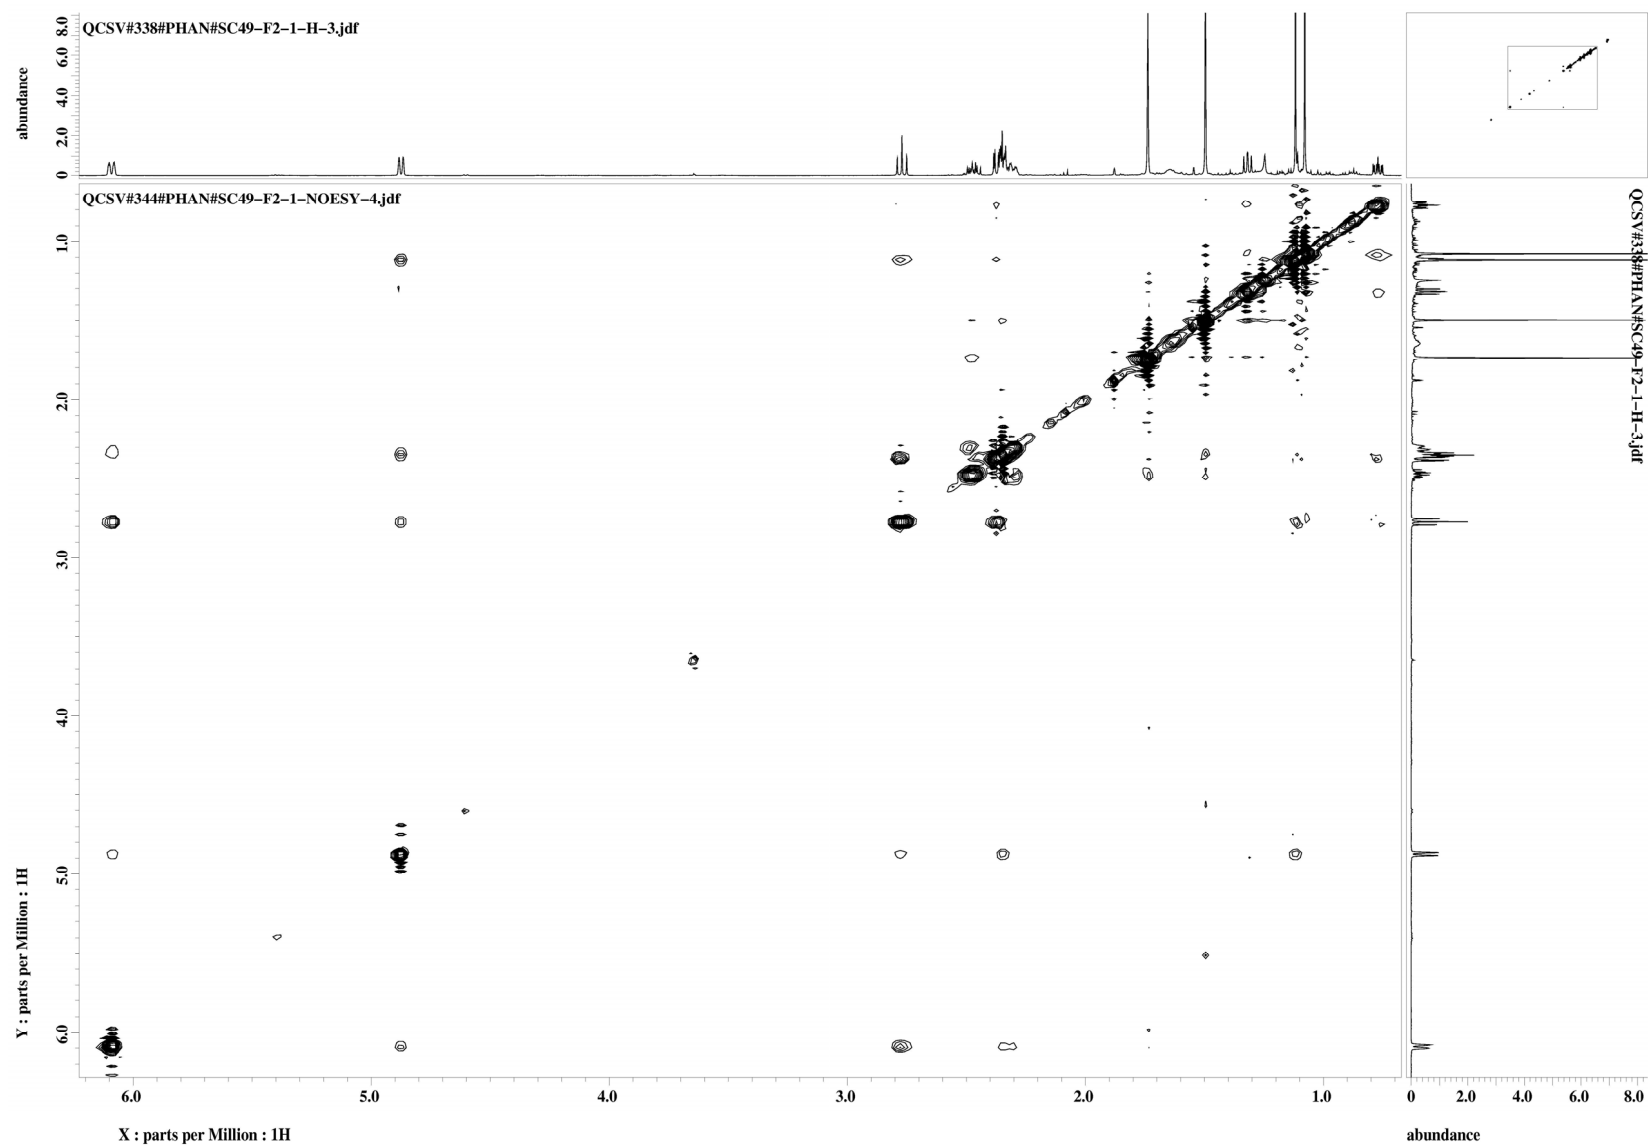

Figure S7. NOESY spectrum of capgermacrene A (1) in CDCl<sub>3</sub>.



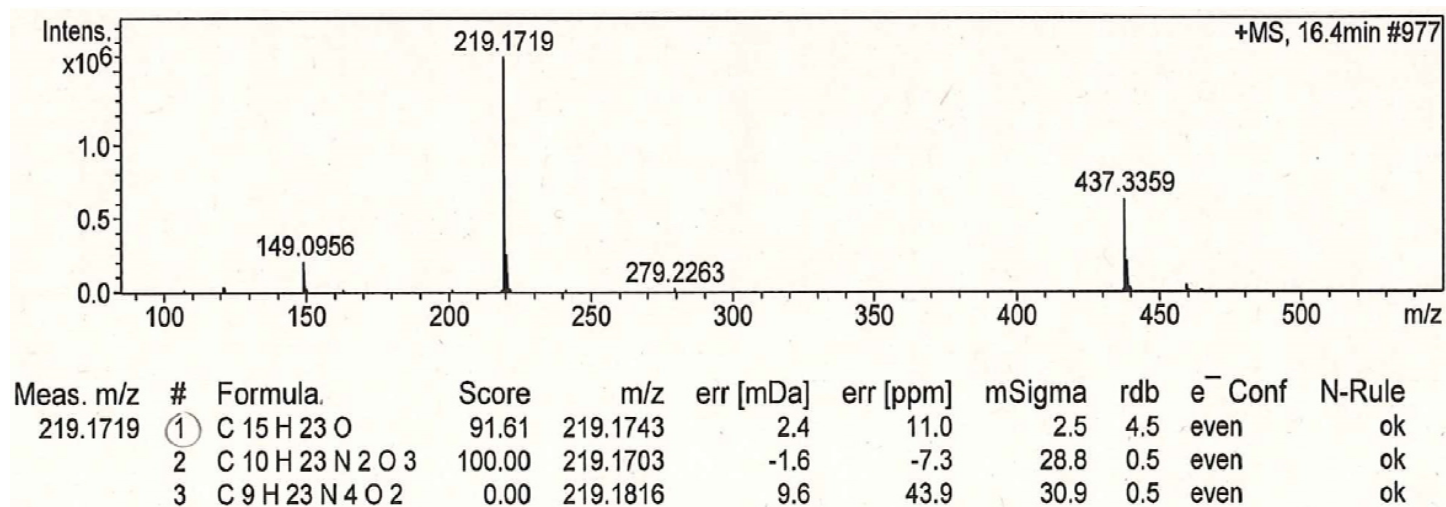

Figure S8. HR-TOFMS data of capgermacrene A (1).

QCSV#390#PHAN#SC49-M-F2-2-2-H-4.jdf

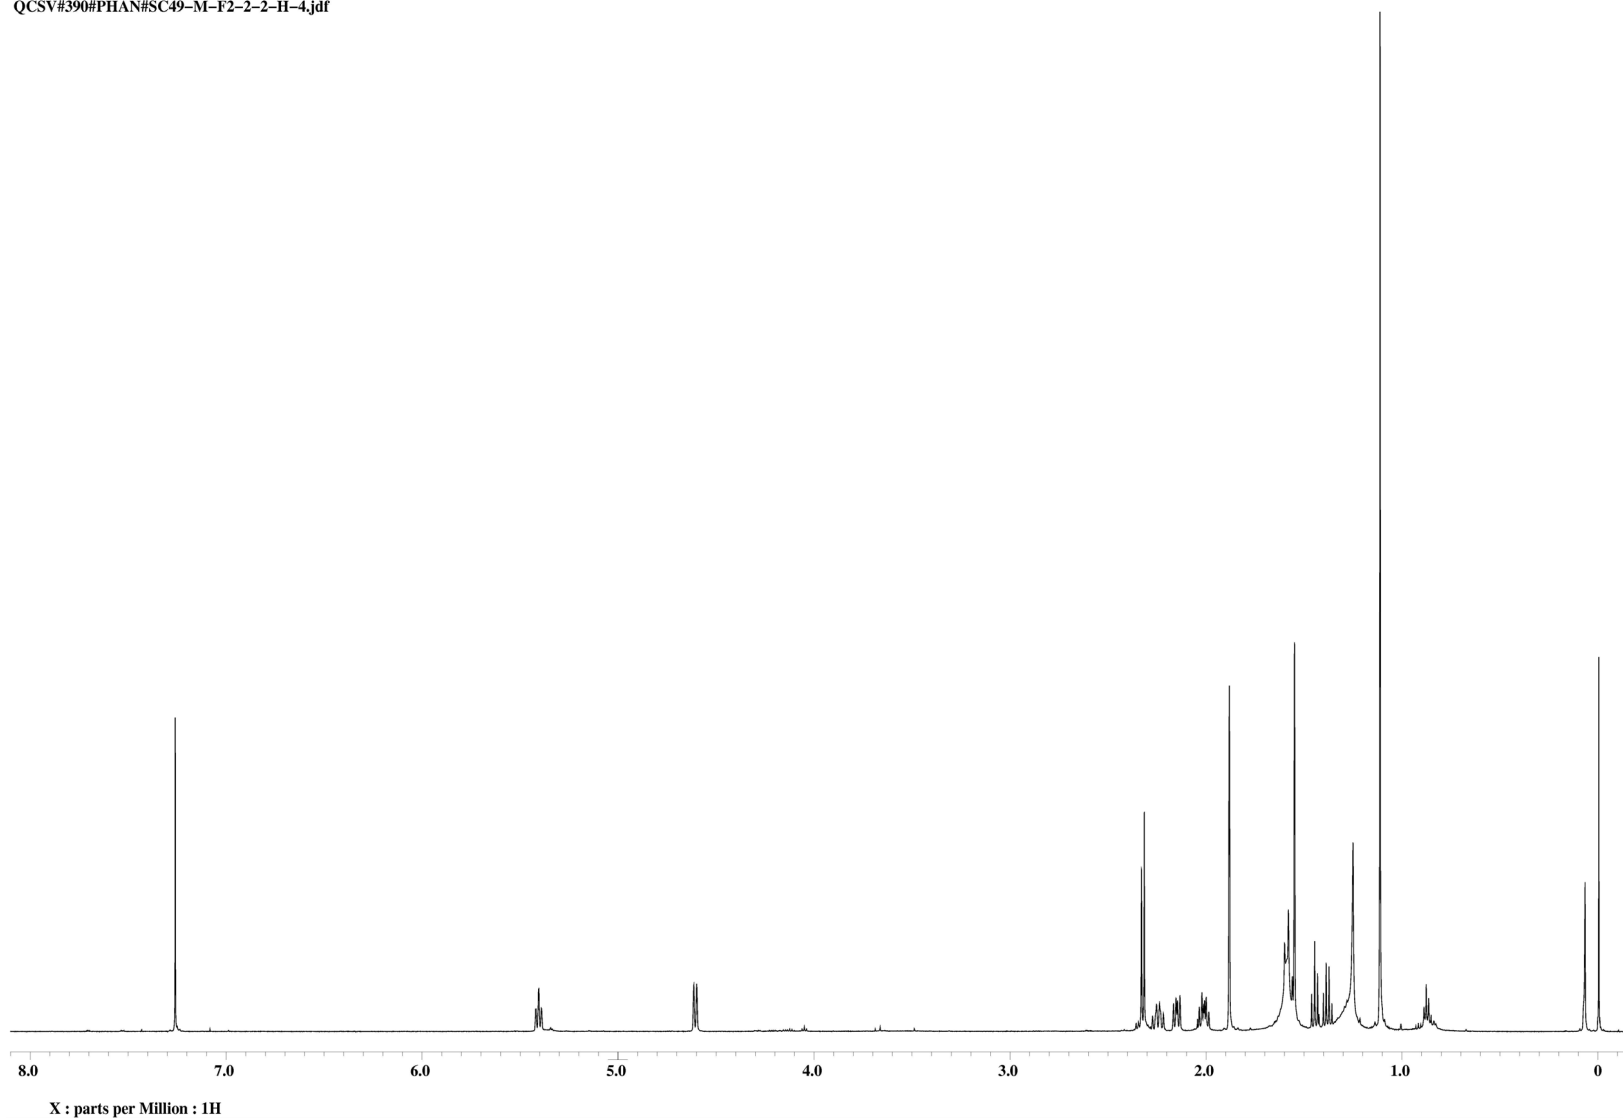

**Figure S9.**  $^1\text{H}$ -NMR spectrum of capgermacrene B (**2**) in  $\text{CDCl}_3$  (600 MHz).

QCSV#391#PHAN#SC49-M-F2-2-2-C-4.jdr

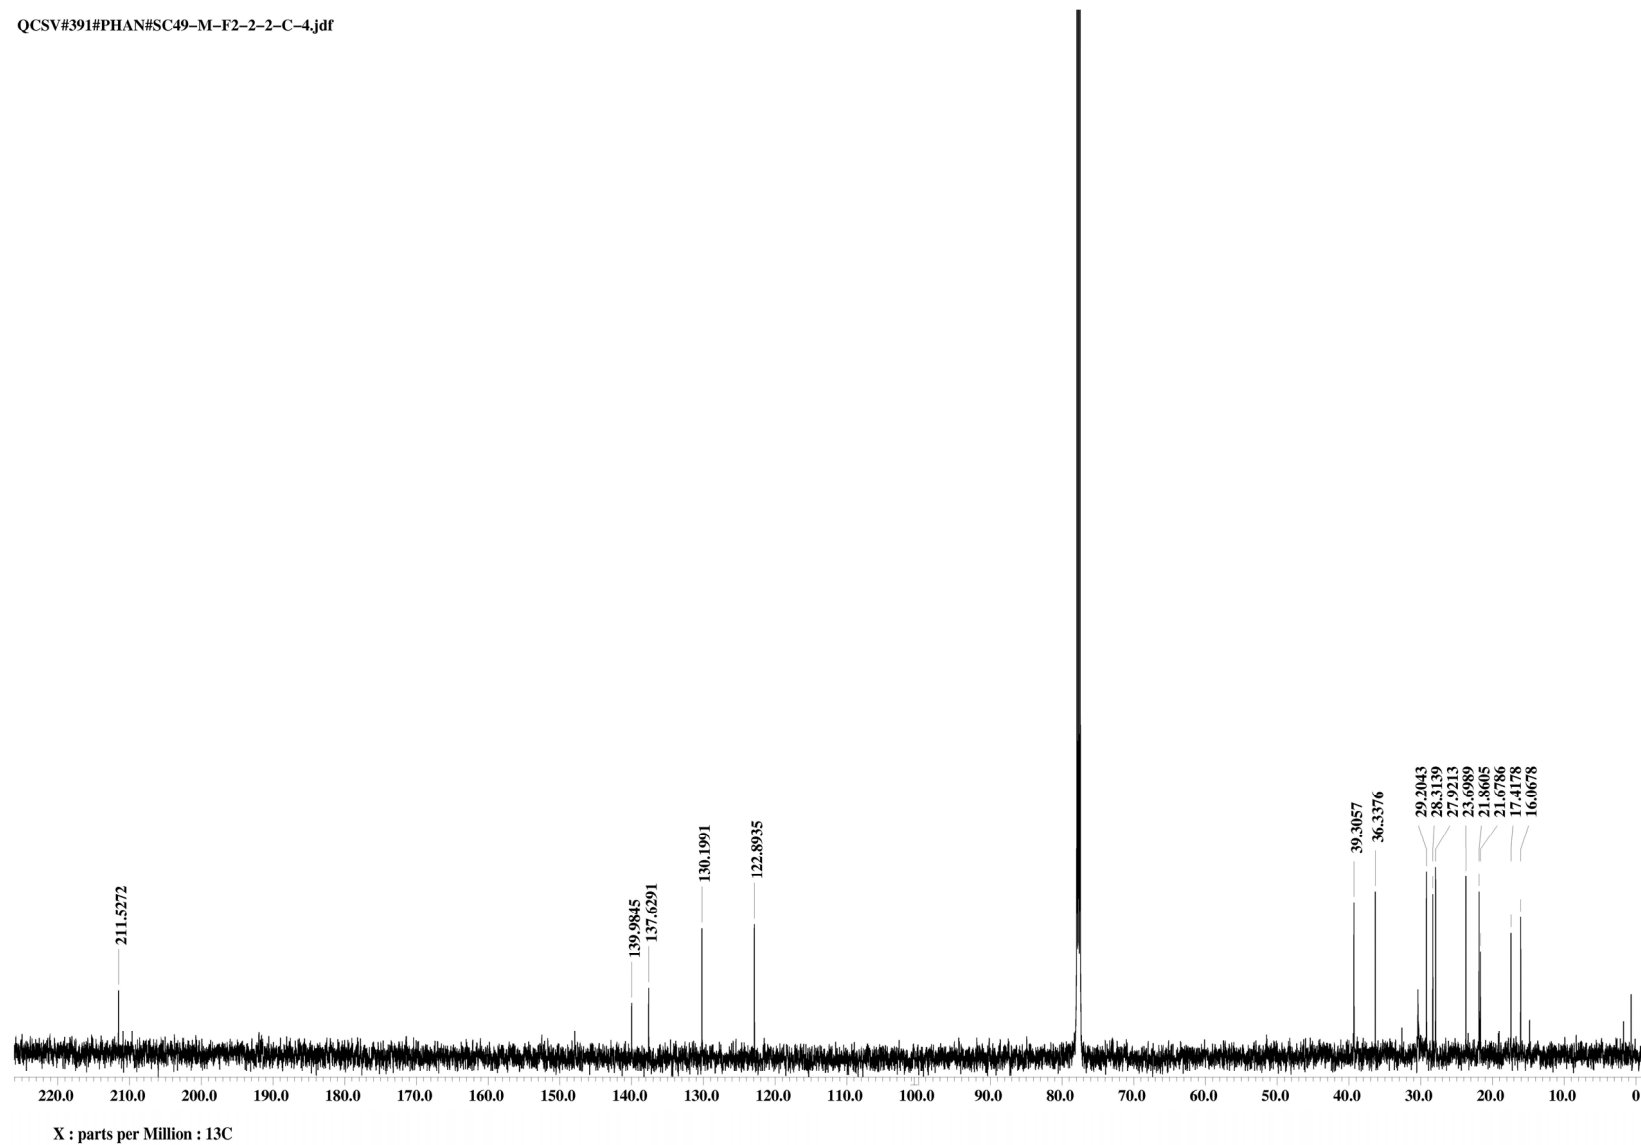

Figure S10.  $^{13}\text{C}$ -NMR spectrum of capgermacrene B (**2**) in  $\text{CDCl}_3$  (150 MHz).

QCSV#392#PHAN#SC49-M-F2-2-2-DEPT-2.jdf

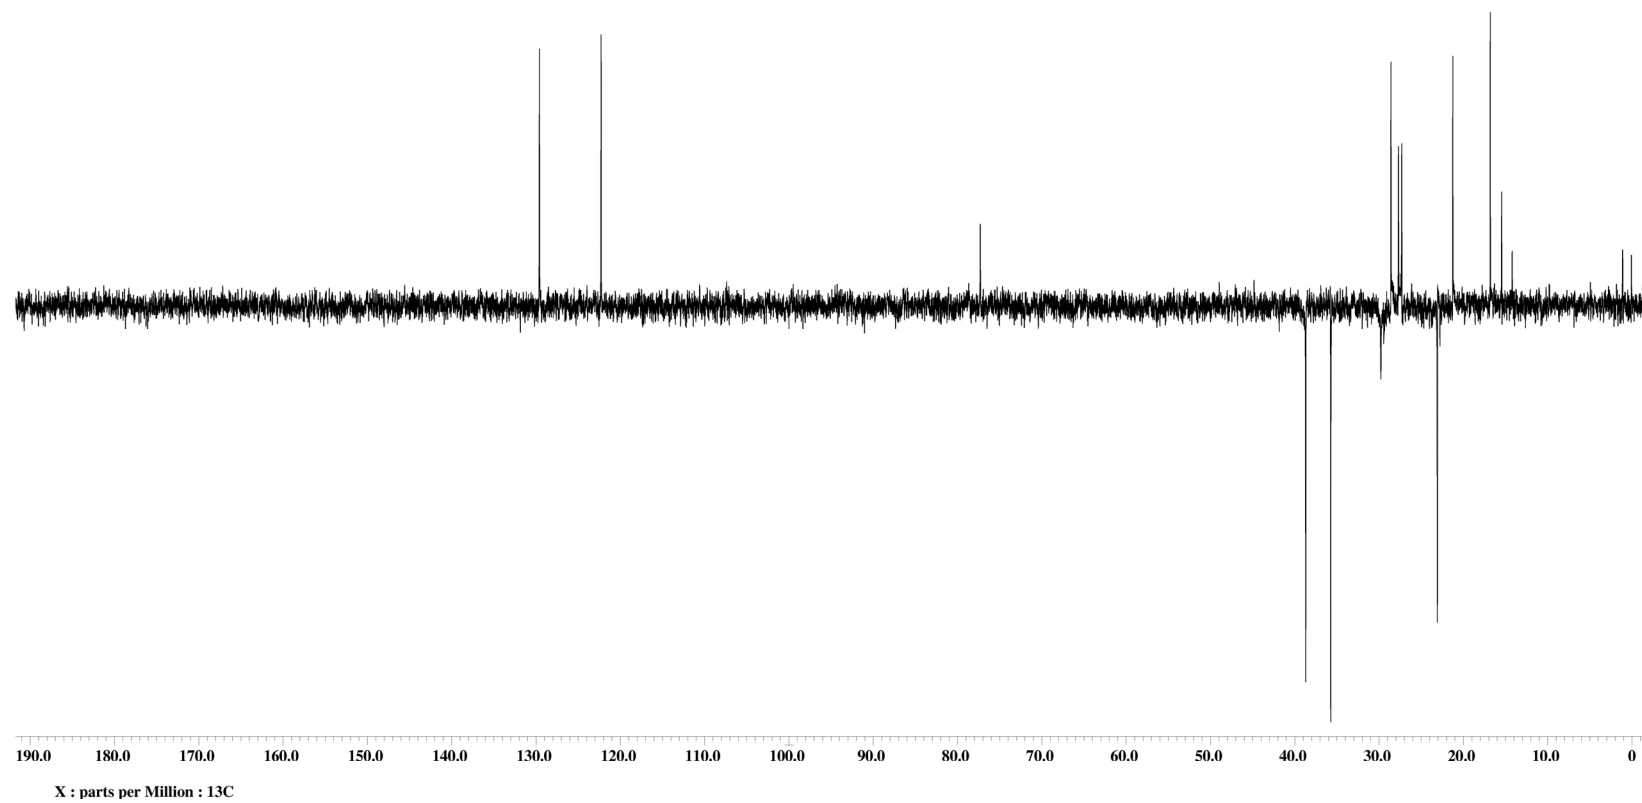

**Figure S11.** DEPT-135 spectrum of capgermacrene B (**2**) in CDCl<sub>3</sub>.

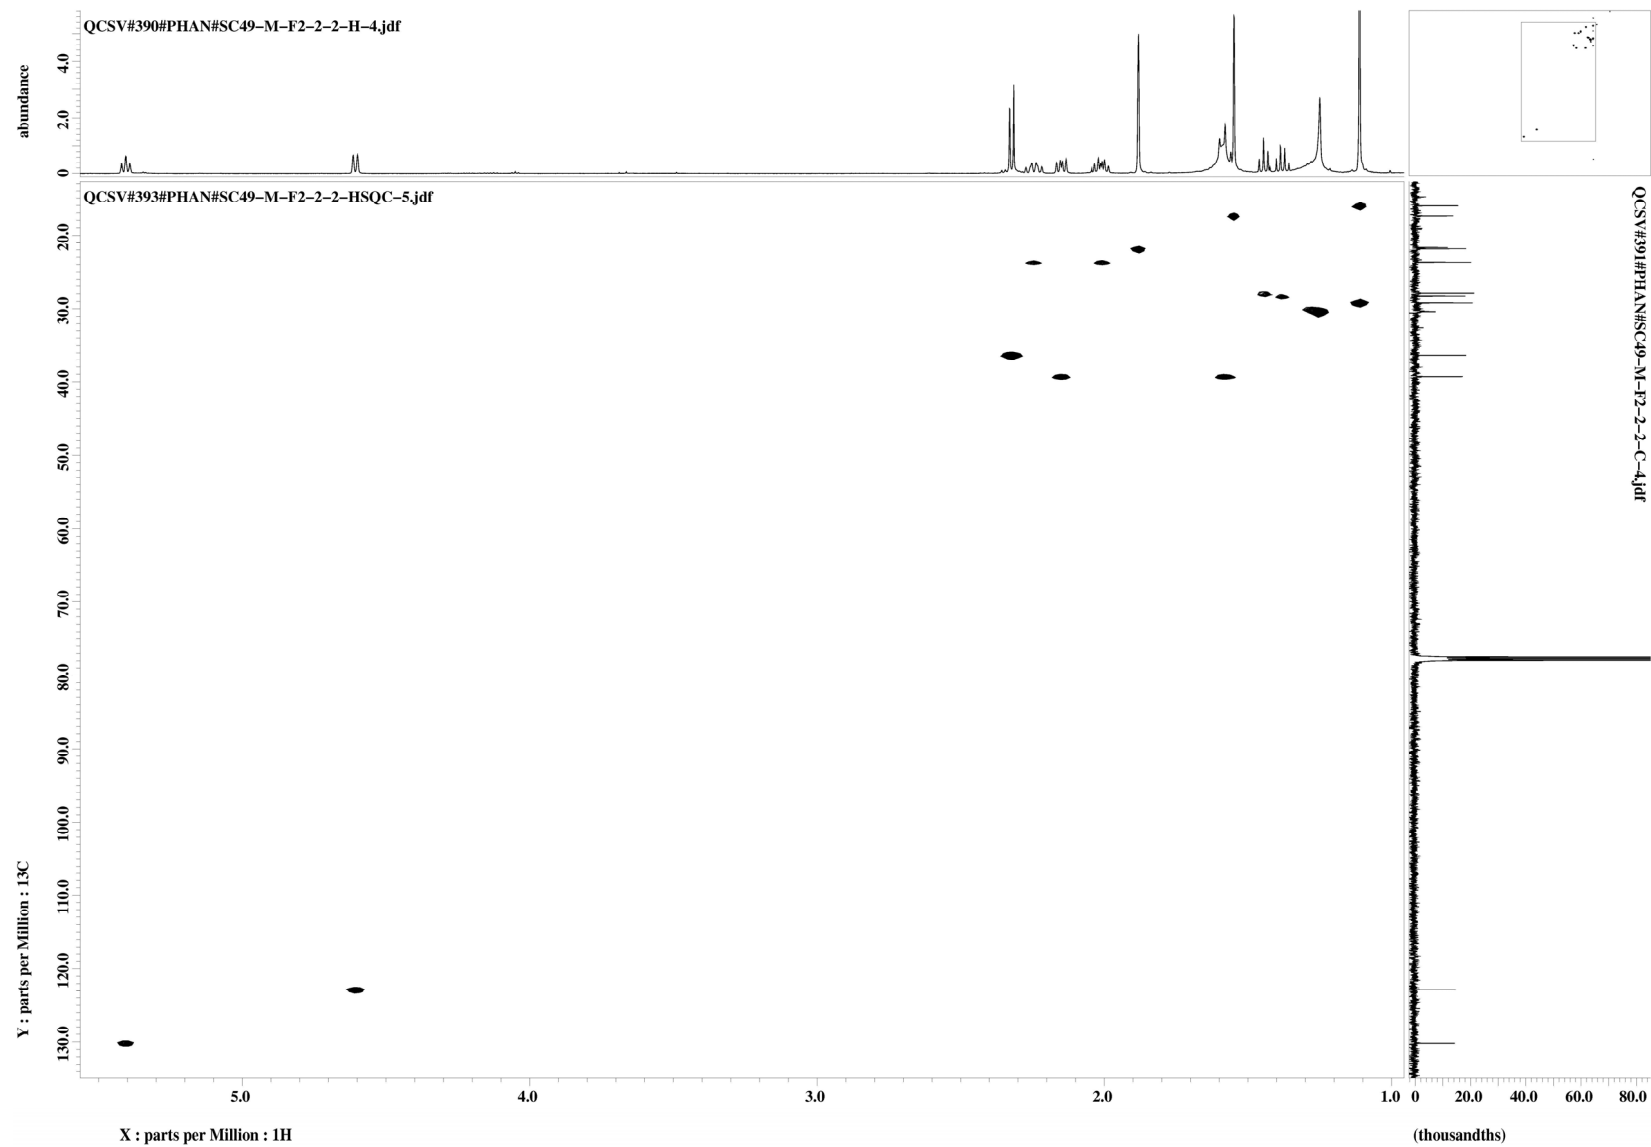

Figure S12. HSQC spectrum of capgermacrene B (2) in CDCl<sub>3</sub>.

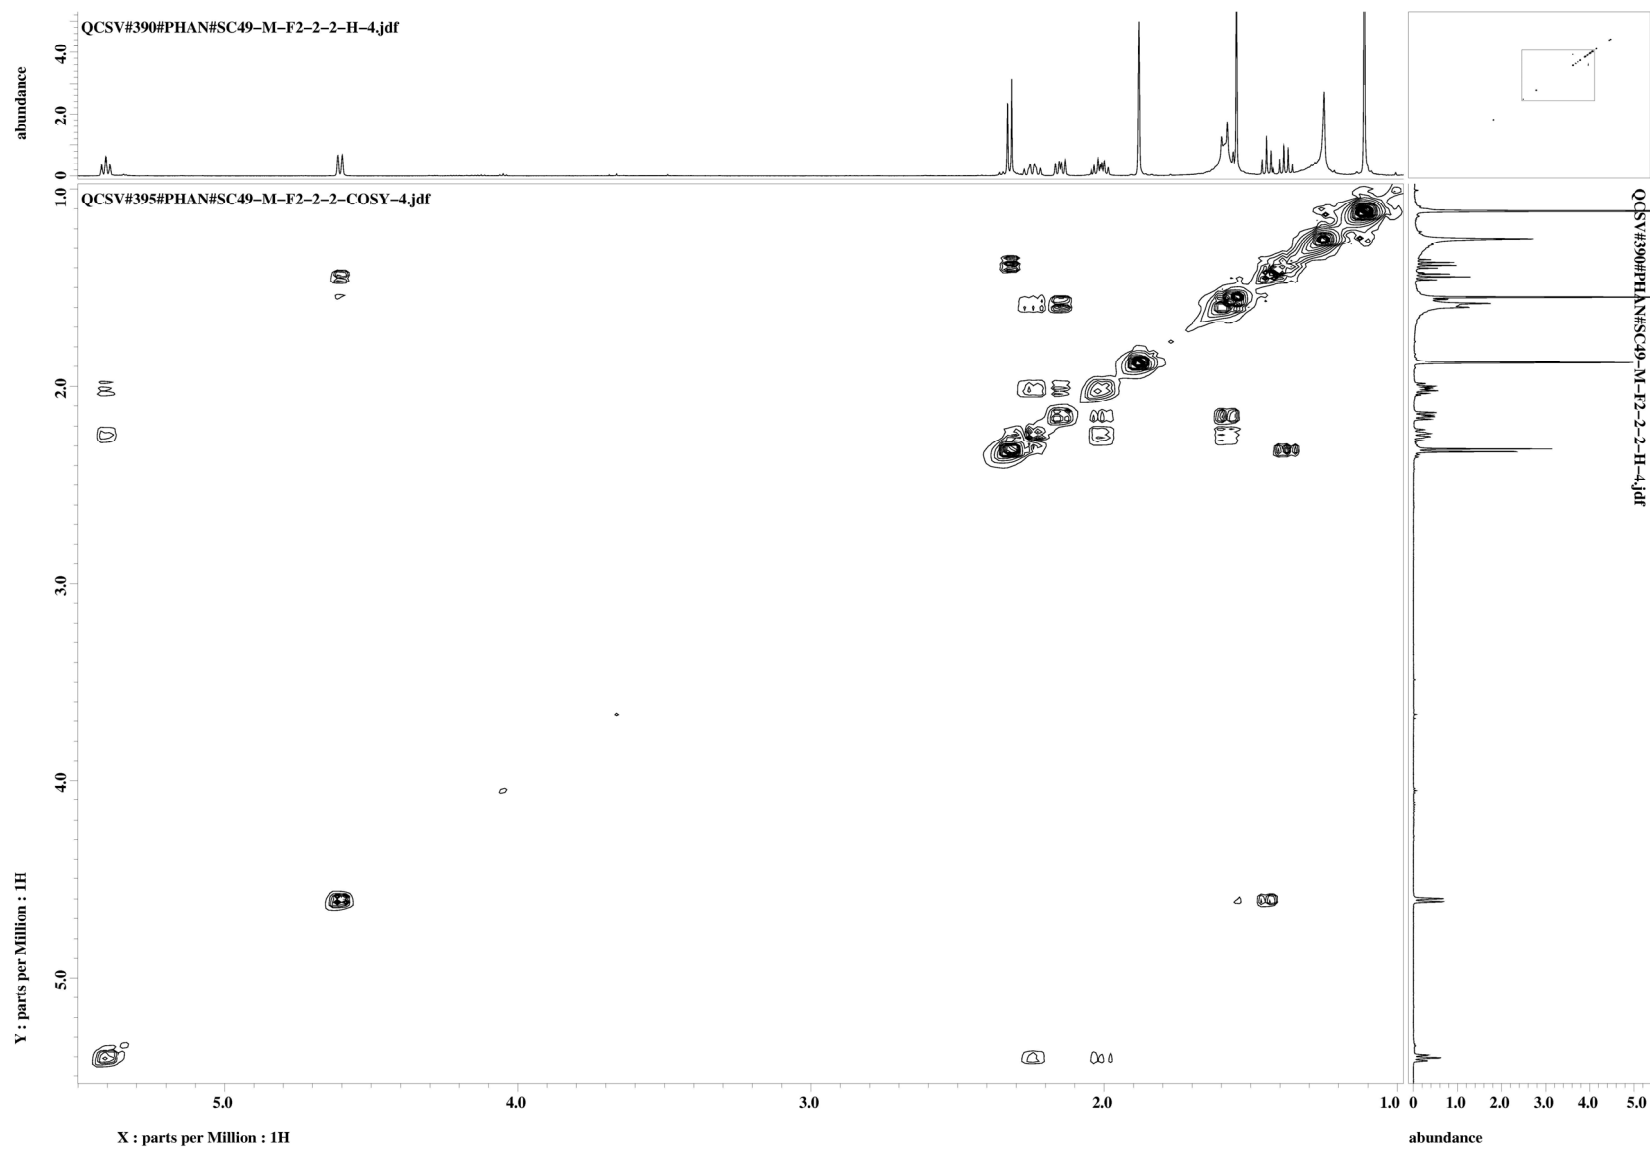

**Figure S13.**  $^1\text{H}$ - $^1\text{H}$  COSY spectrum of capgermacrene B (2) in  $\text{CDCl}_3$ .

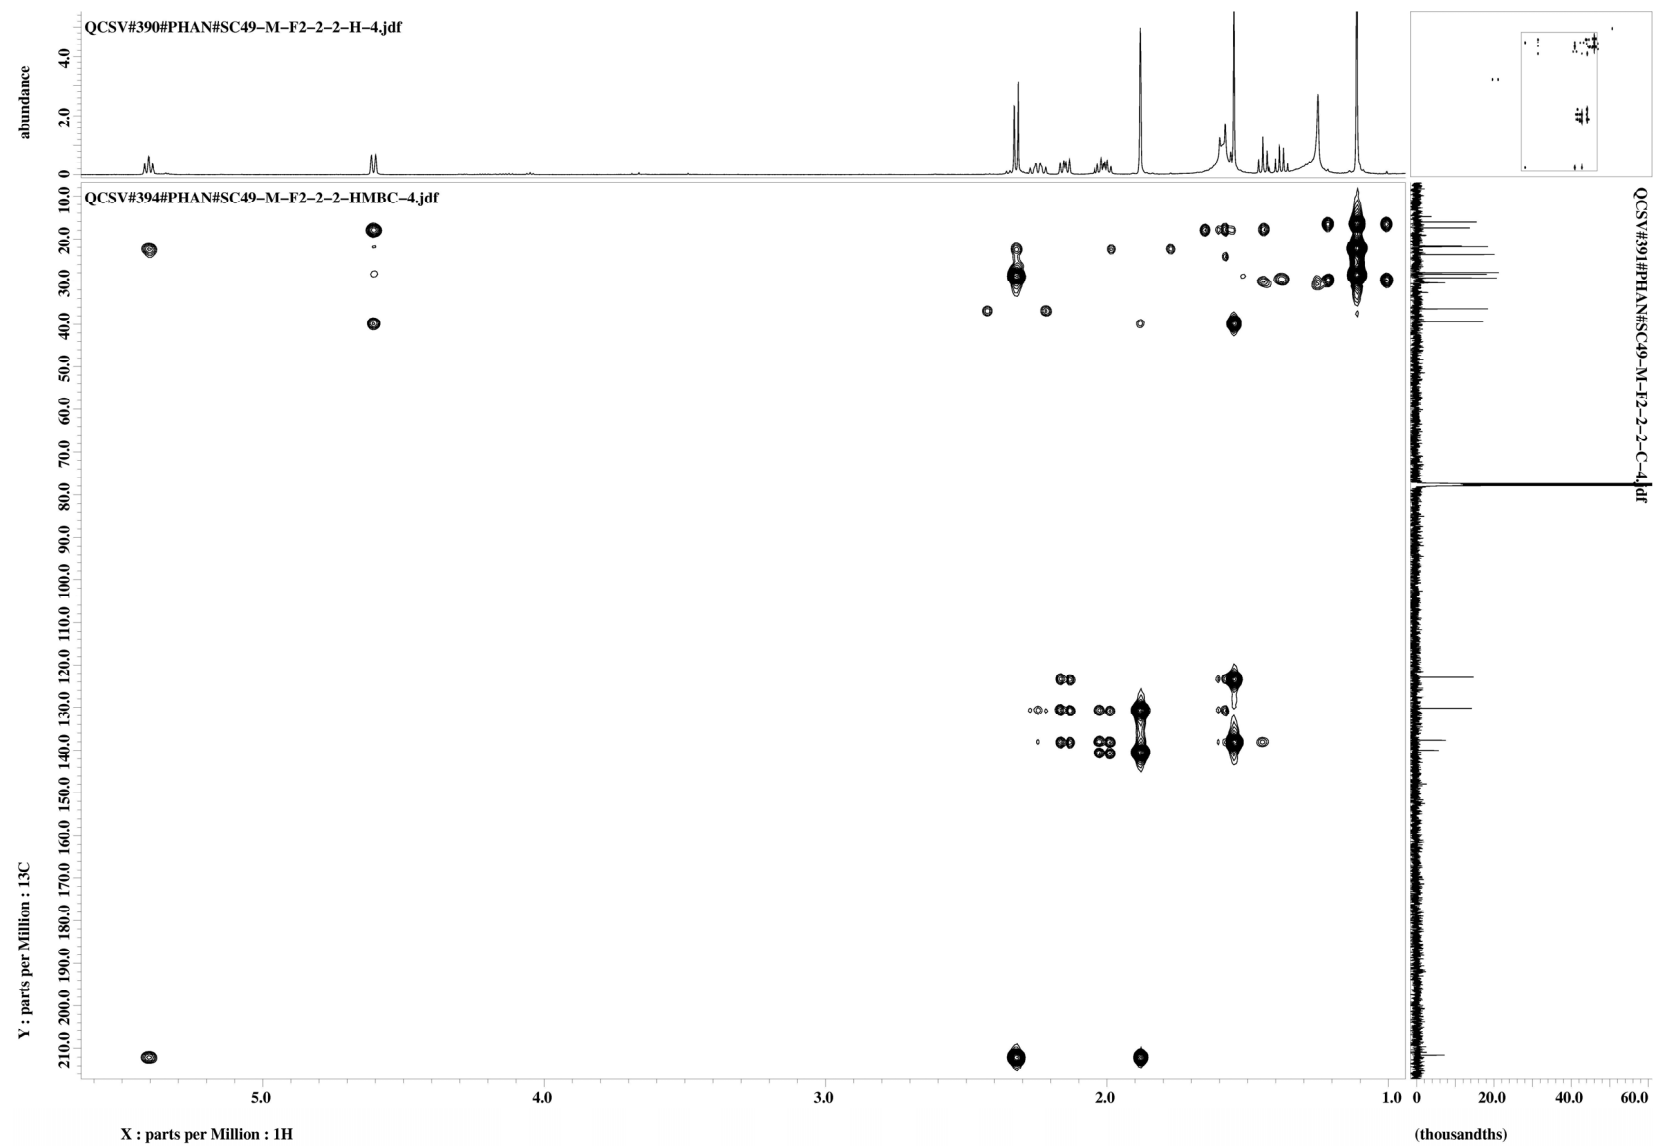

Figure S14. HMBC spectrum of capgermacrene B (2) in CDCl<sub>3</sub>.

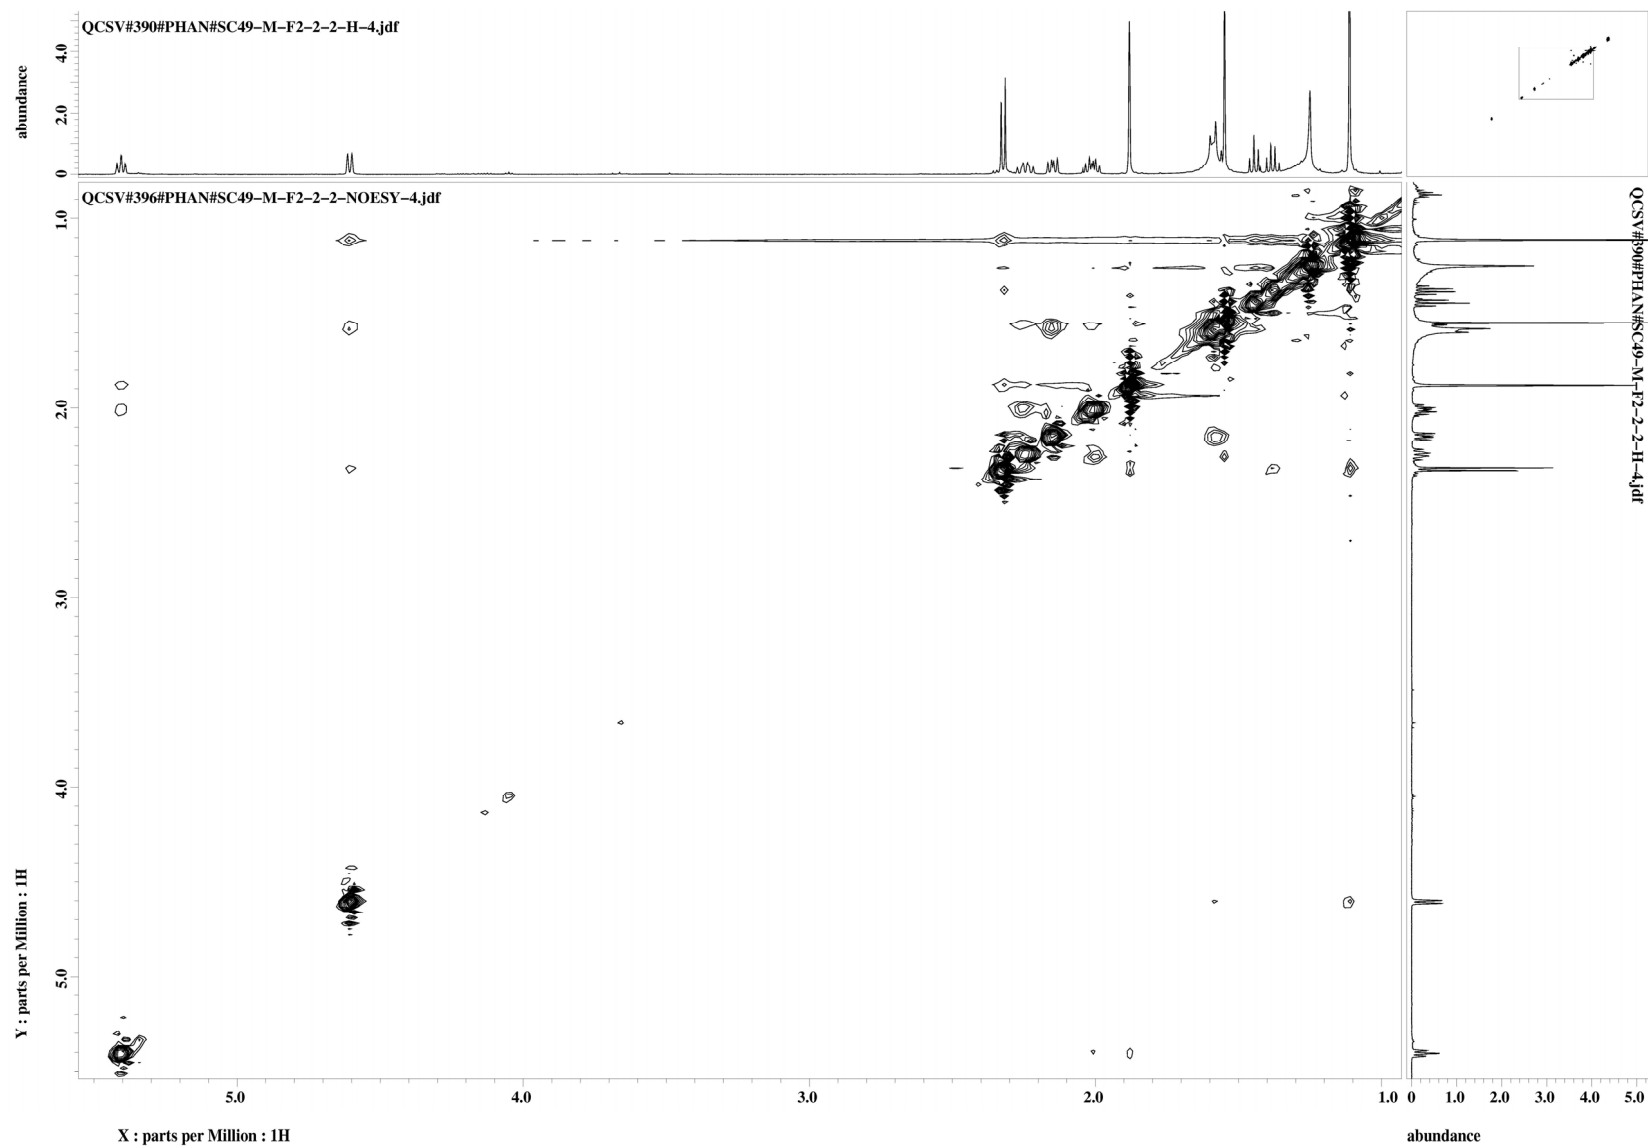

**Figure S15.** NOESY spectrum of capgermacrene B (**2**) in CDCl<sub>3</sub>.



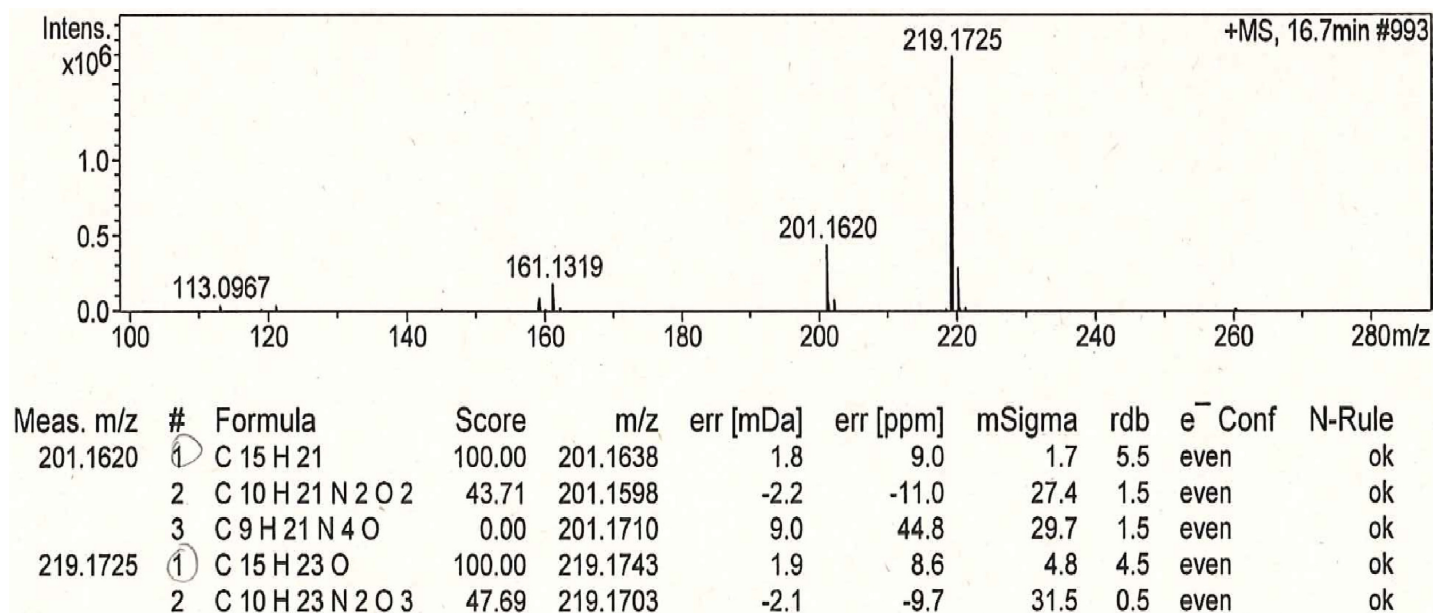

**Figure S16.** HR-TOFMS data of capgermacrene B (2).
